# Supplementary material for: Fruit of Gardenia jasminoides Induces Mitochondrial Activation and Non-Shivering Thermogenesis through Regulation of PPARγ
Source: MDPI journal article supplement (doi:10.3390/antiox10091418), 2021-09-05
Supplement: s1 [file s1]

## Supplemental data

Fruit of *Gardenia jasminoides* induces mitochondrial activation and non-shivering thermogenesis through regulation of PPAR $\gamma$

*Park et al.*

**Figure S1**

**Figure S2**

**Figure S3**

**Figure S4**

**Figure S5**

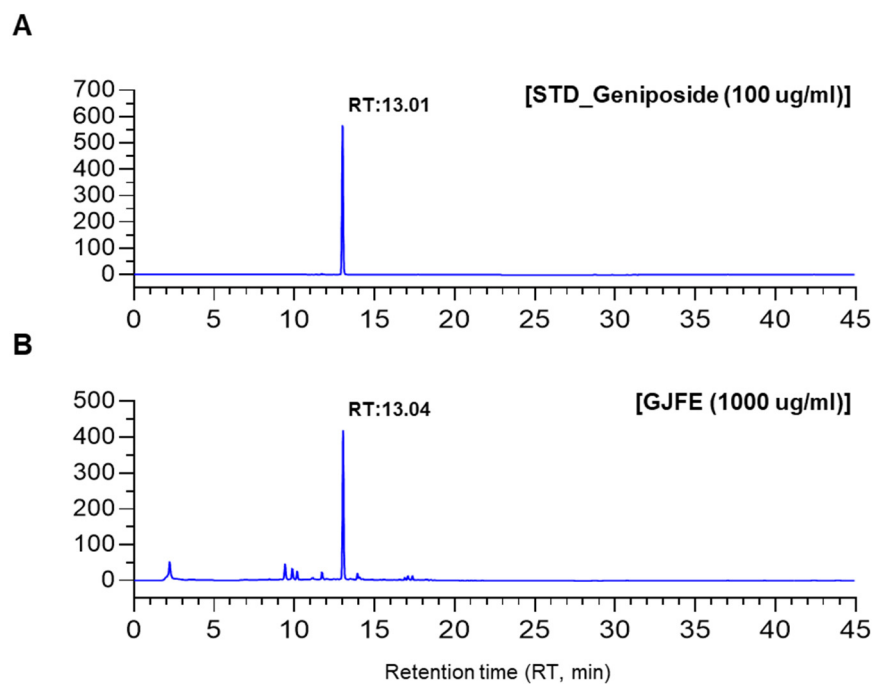

**Figure S1. HPLC analysis of geniposide in GJFE.** Chromatograms of (A) geniposide and (B) GJFE were exhibited by HPLC analysis. GJFE, *Gardenia jasminoides* fruit extract.

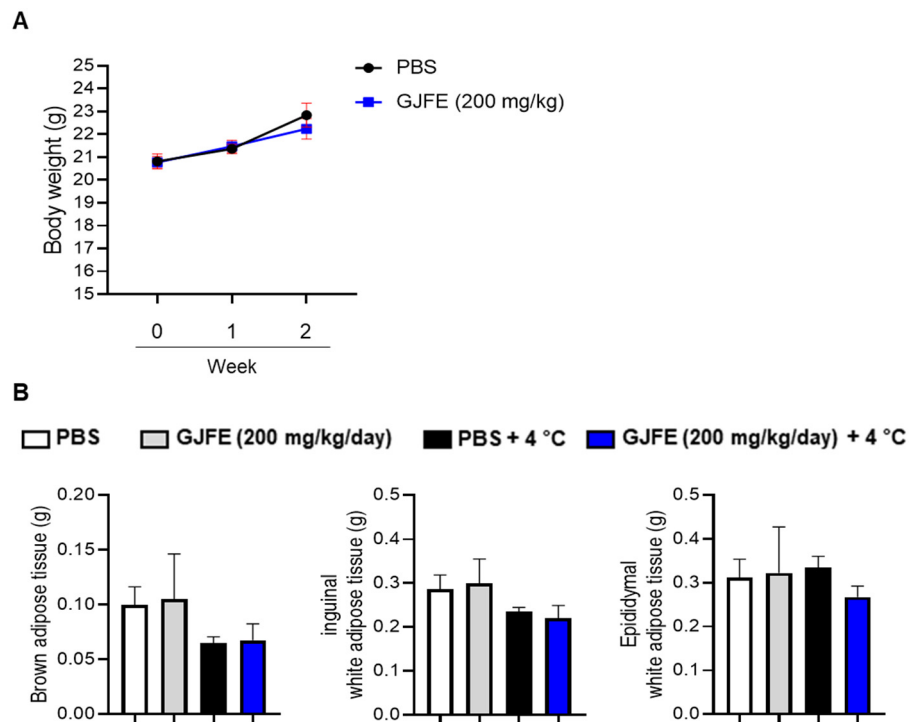

**Figure S2. Effect of GJFE on body and tissue weight in cold-exposed mice.** (A) Body weight of PBS-fed or GJFE-fed mice ( $n = 10$ ) was measured at indicated time points. (B) Weight of BAT, iWAT, and eWAT was measured ( $n = 5$ ). GJFE, *Gardenia jasminoides* fruit extract; BAT, brown adipose tissue; iWAT, inguinal white adipose tissue; eWAT, epididymal white adipose tissue.

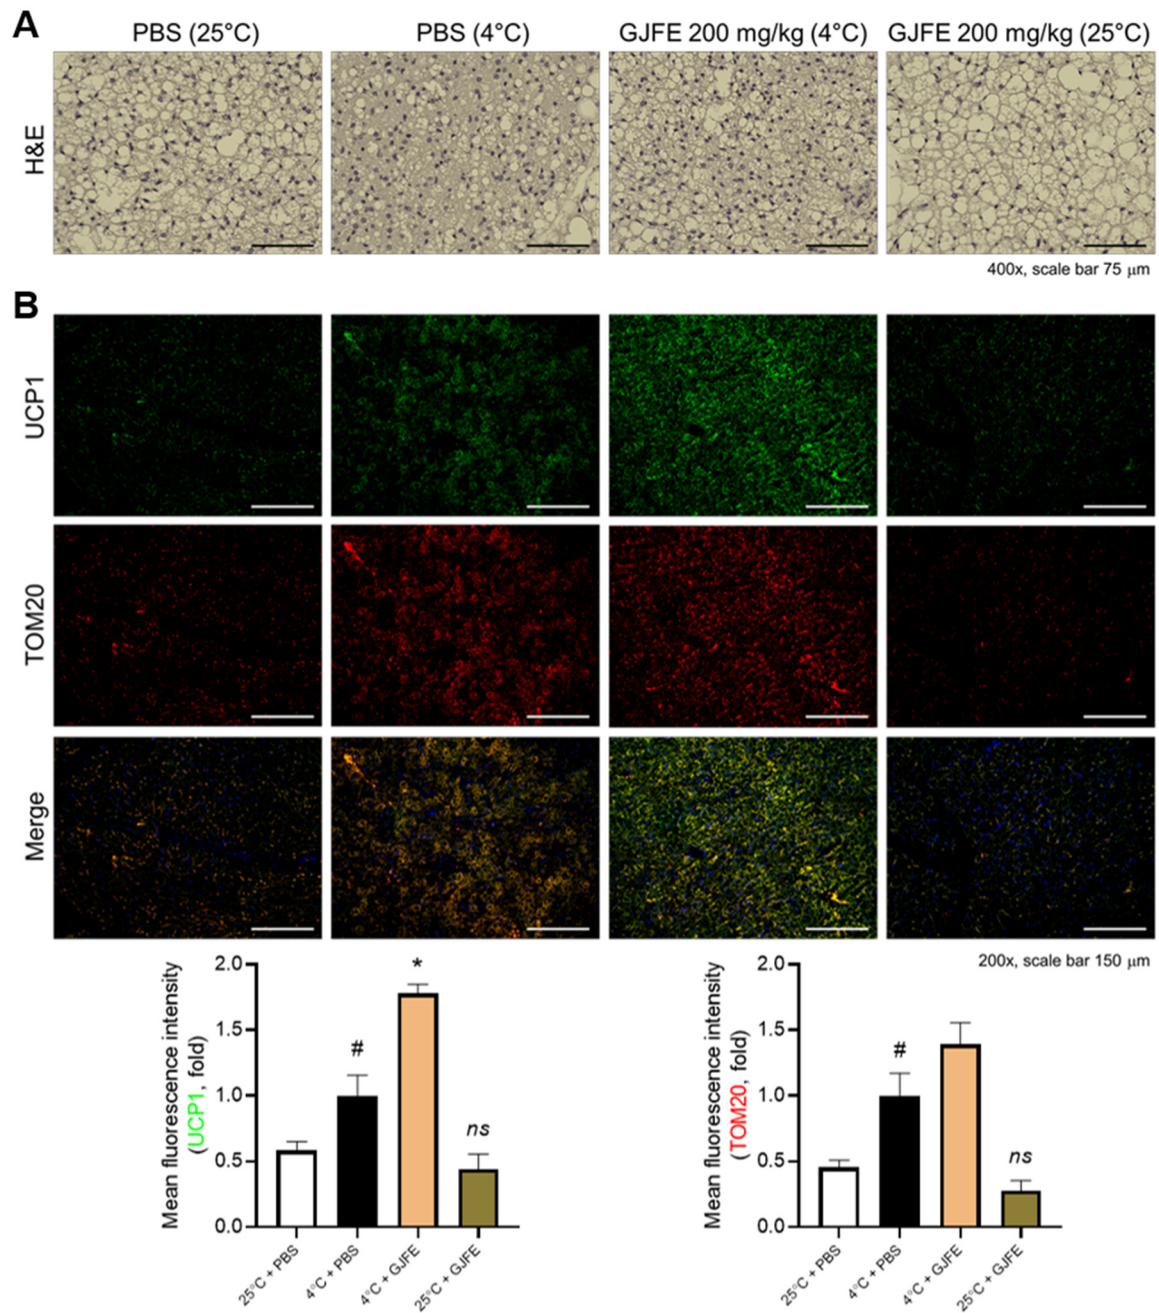

**Figure S3. Effect of GJFE on BAT in cold-exposed mice.** (A) Paraffin-embedded iBAT were stained with H&E (magnification 400 $\times$ , scale bar 75  $\mu$ m). (B) UCP1 (green) and TOM20 (red), and nuclei (blue) were detected in the BAT of the mice by immunofluorescence staining (magnification 200 $\times$ , scale bar 150  $\mu$ m). Intensity of the proteins was quantified using the ImageJ software. All data are expressed as the mean  $\pm$  S.E.M. of the data from three or more separate experiments. # $p$  < 0.05 vs. BAT of PBS-fed mice, \* $p$  < 0.05 vs. BAT of PBS-fed and cold-exposed mice. ns, no significant difference. GJFE, *Gardenia jasminoides* fruit extract.

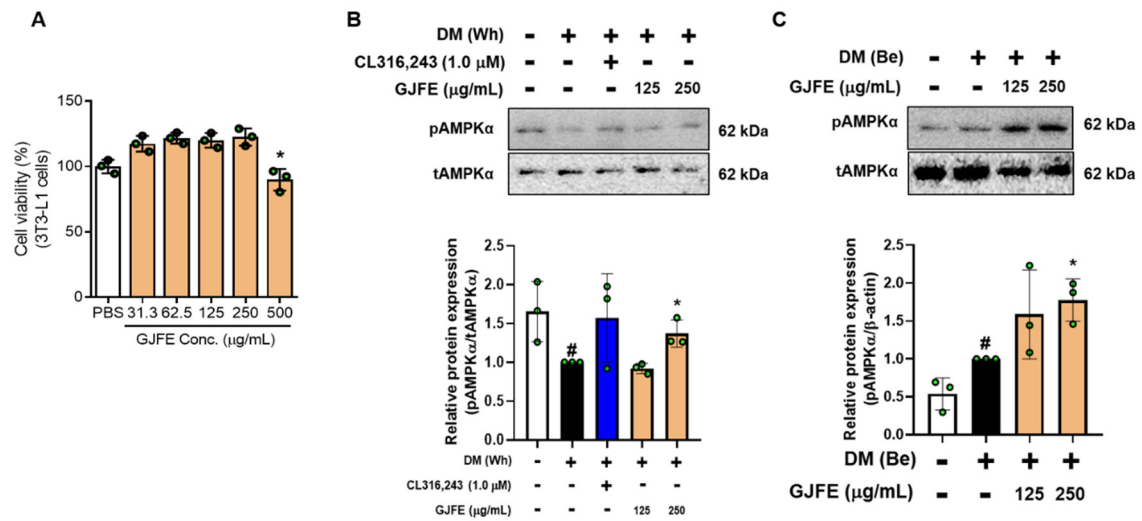

**Figure S4. Effect of GJFE on cytotoxicity and protein levels of AMPK in 3T3-L1 adipocytes.** (A) Cytotoxicity of GJFE was measured by WST-1 analysis. Phosphorylation of AMPK in (B) white-induced 3T3-L1 cells and (C) beige-induced 3T3-L1 cells was analyzed by Western blot analysis, normalized by levels of total AMPK, and quantified using the ImageJ software. All data are expressed as the mean  $\pm$  S.E.M. of the data from three or more separate experiments.  $^{\#}p < 0.05$  vs. DM-untreated 3T3-L1 cells,  $^*p < 0.05$  vs. PBS-treated 3T3-L1 cell (A) or DM-treated 3T3-L1 cells (B and C). GJFE, *Gardenia jasminoides* fruit extract.

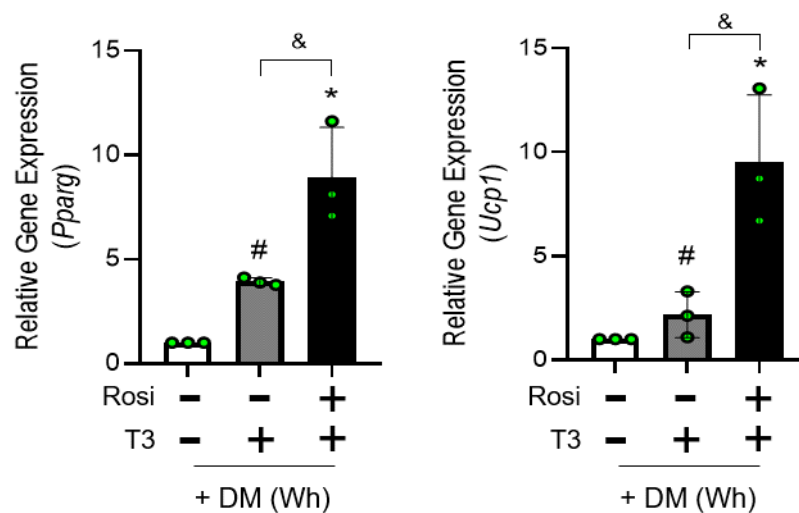

**Figure S5. Effect of PPAR $\gamma$  agonist on mRNA expression of UCP1 in beige adipocytes.** mRNA expression of *Pparg* and *Ucp1* was measured by RT-PCR analysis and normalized by *Gapdh*. All data are expressed as the mean  $\pm$  S.E.M. of the data from three or more separate experiments. # $p < 0.05$  vs. DM (Wh)-treated 3T3-L1 cells, \* $p < 0.05$  vs. DM (Wh) and T3-treated 3T3-L1 cells. GJFE, *Gardenia jasminoides* fruit extract. Rosi; rosiglitazone.
